# Supplementary material for: Field-induced slow magnetic relaxation in pseudooctahedral cobalt(ii) complexes with positive axial and large rhombic anisotropy
Source: Royal Society of Chemistry journal article supplement (doi:10.1039/c8dt03965h), 2018-12-27
Supplement: c8dt03965h1.pdf [file c8dt03965h1.pdf]

Supporting Information for the manuscript

## **Field-Induced Slow magnetic Relaxation in Pseudooctahedral Cobalt(II) Complexes with Positive Axial and Large Rhombic Anisotropy†**

Anna Świtlicka\*<sup>a</sup>, Joanna Palion-Gazda<sup>a</sup>, Barbara Machura<sup>a</sup>, Joan Cano\*<sup>b,c</sup>, Francesc Lloret<sup>c</sup>  
and Miguel Julve<sup>c</sup>

<sup>a</sup>*Department of Crystallography, Institute of Chemistry, University of Silesia, 9<sup>th</sup> Szkolna St., 40-006 Katowice, Poland, E-mail: [anna.switlicka@us.edu.pl](mailto:anna.switlicka@us.edu.pl)*

<sup>b</sup>*Department of Química Inorgànica/Instituto de Ciencia Molecular (ICMol), Facultat de Química de la Universitat de València, C/ Catedrático Jose Beltrán 2, 46980 Paterna, València, Spain. E-mail: [joan.cano@uv.es](mailto:joan.cano@uv.es)*

<sup>c</sup>*Fundació General de la Universitat de València (FGUV), Universitat de València, 96480 Paterna, València, Spain*

## Table of Contents

|                   |                                                                                                                                                                                                                                                                                                                                                                                                                                                                 |
|-------------------|-----------------------------------------------------------------------------------------------------------------------------------------------------------------------------------------------------------------------------------------------------------------------------------------------------------------------------------------------------------------------------------------------------------------------------------------------------------------|
| <b>Figure S1</b>  | The powder XPRD pattern of <b>1</b>                                                                                                                                                                                                                                                                                                                                                                                                                             |
| <b>Figure S2</b>  | The powder XPRD pattern of <b>2</b> .                                                                                                                                                                                                                                                                                                                                                                                                                           |
| <b>Figure S3</b>  | IR spectra of <b>1</b>                                                                                                                                                                                                                                                                                                                                                                                                                                          |
| <b>Figure S4</b>  | IR spectra of <b>2</b>                                                                                                                                                                                                                                                                                                                                                                                                                                          |
| <b>Figure S5</b>  | UV-ViS-NIR spectra for <b>1</b>                                                                                                                                                                                                                                                                                                                                                                                                                                 |
| <b>Figure S6</b>  | UV-ViS-NIR spectra for <b>2</b>                                                                                                                                                                                                                                                                                                                                                                                                                                 |
| <b>Figure S7</b>  | Frequency-dependence of the in-phase (a) and out-of-phase (b) ac susceptibilities for <b>1</b> under an applied static field $H_{dc} = 1000$ G with a $\pm 5.0$ G oscillating field at frequencies in the range 1.0-10 kHz. Cole-Cole plots at 5.0 and 4.0 K (c) and the Arrhenius plot (black line) and the best fit to two approaches: one with two Orbach processes, and the other one with one Raman plus one direct relaxation processes (black line) (d). |
| <b>Figure S8</b>  | Frequency-dependence of the in-phase (a) and out-of-phase (b) ac susceptibilities for <b>2</b> under an applied static field $H_{dc} = 1000$ G with a $\pm 5.0$ G oscillating field at frequencies in the range 1.0-10 kHz. Cole-Cole plots at 3.5 and 2.5 K (c) and the Arrhenius plot (black line) and the best fit to two approaches: one with two Orbach processes, and the other one with one Raman plus one direct relaxation processes (black line) (d). |
| <b>Figure S9</b>  | Frequency-dependence of the in-phase (left) and out-of-phase (right) ac susceptibilities for <b>1</b> under applied static fields $H_{dc} = 1000$ (a) and 2500 G (b) with a $\pm 5.0$ G oscillating field at temperatures in the range 2.0-12 K. Above and below 8 K, the intervals of the temperature are 0.5 and 0.25 K, respectively.                                                                                                                        |
| <b>Figure S10</b> | Frequency-dependence of the in-phase (left) and out-of-phase (right) ac susceptibilities for <b>2</b> under applied static fields $H_{dc} = 1000$ (a) and 2500 G (b) with a $\pm 5.0$ G oscillating field at temperatures in the range 2.0-12 K. Above and below 5.5 K, the intervals of the temperature are 0.5 and 0.25 K, respectively.                                                                                                                      |
| <b>Table S1</b>   | Selected magneto-structural parameters for mononuclear six-coordinate SIM cobalt(II) complexes                                                                                                                                                                                                                                                                                                                                                                  |
| <b>Table S2</b>   | Energy of all calculated excited states and their contributions to the $D$ and $E$ values for the optimized geometries <b>1</b> and <b>2</b> obtained from CASSCF/NEVPT2 calculations.                                                                                                                                                                                                                                                                          |
| <b>Table S3</b>   | Energies of the low-lying Kramers doublets corresponding to the ground and first excited states, which should be related to those generated from a 1 <sup>st</sup> order spin-orbit coupling, for the optimized geometries <b>1</b> and <b>2</b> obtained from CASSCF/NEVPT2 calculations.                                                                                                                                                                      |
| <b>Table S4</b>   | Selected ac magnetic data at different applied dc fields for <b>1</b> and <b>2</b> .                                                                                                                                                                                                                                                                                                                                                                            |
| <b>Table S5</b>   | Main parameters extracted from the Cole-Cole plots for <b>1</b> and <b>2</b> .                                                                                                                                                                                                                                                                                                                                                                                  |
| <b>Table S6</b>   | XYZ coordinates (in angstroms) for the optimized molecular geometry of <b>1</b> using a PBE functional.                                                                                                                                                                                                                                                                                                                                                         |
| <b>Table S7</b>   | XYZ coordinates (in angstroms) for the optimized molecular geometry of <b>2</b> using a PBE functional.                                                                                                                                                                                                                                                                                                                                                         |

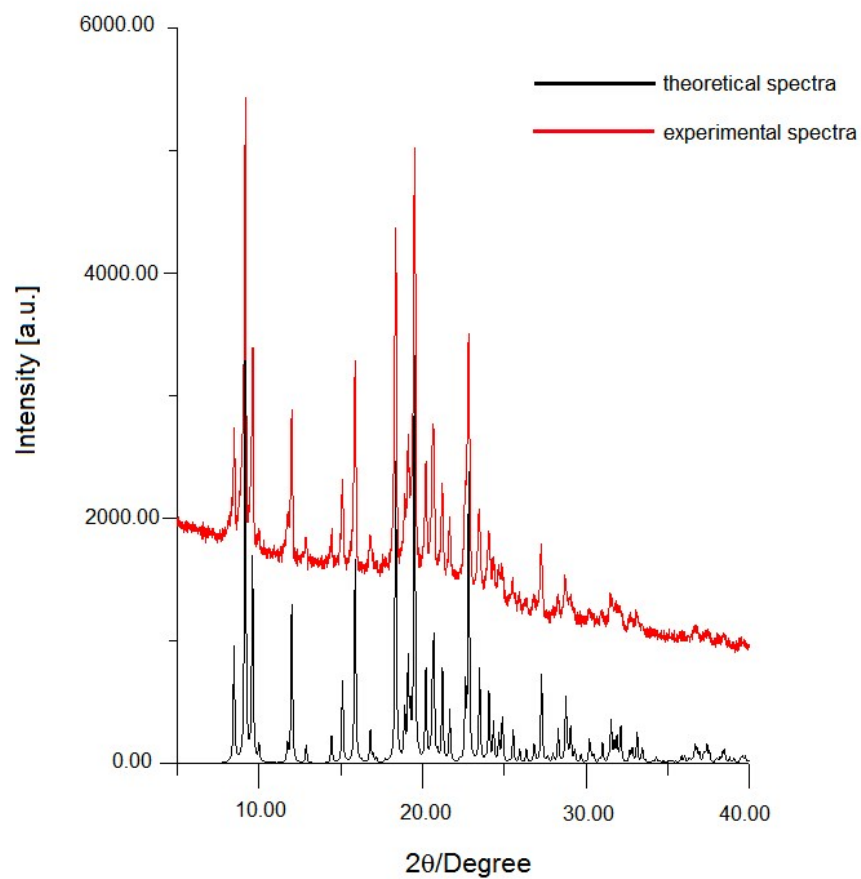

**Figure S1.** The powder XPRD pattern of **1**

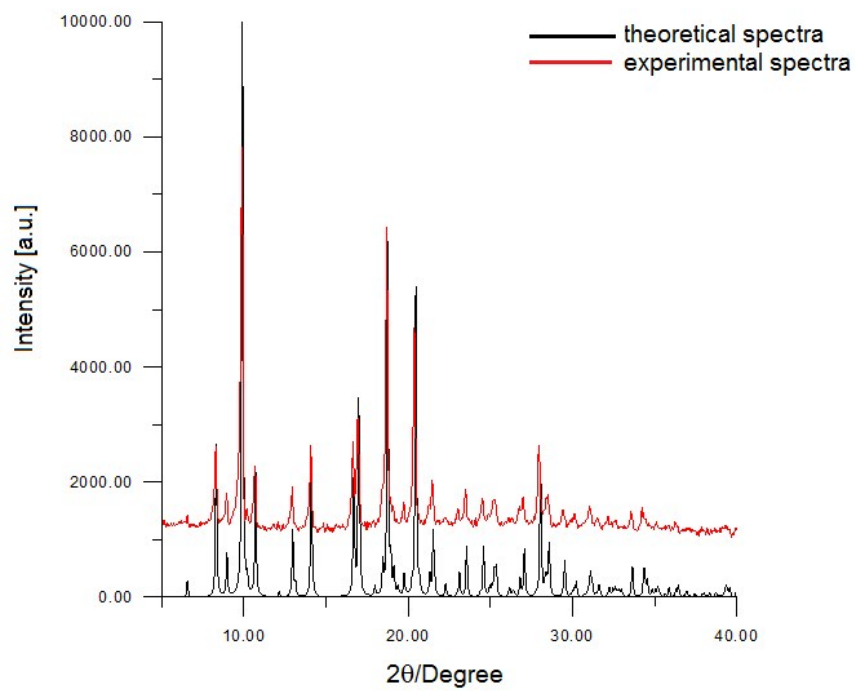

**Figure S2.** The powder XPRD pattern of **2**.

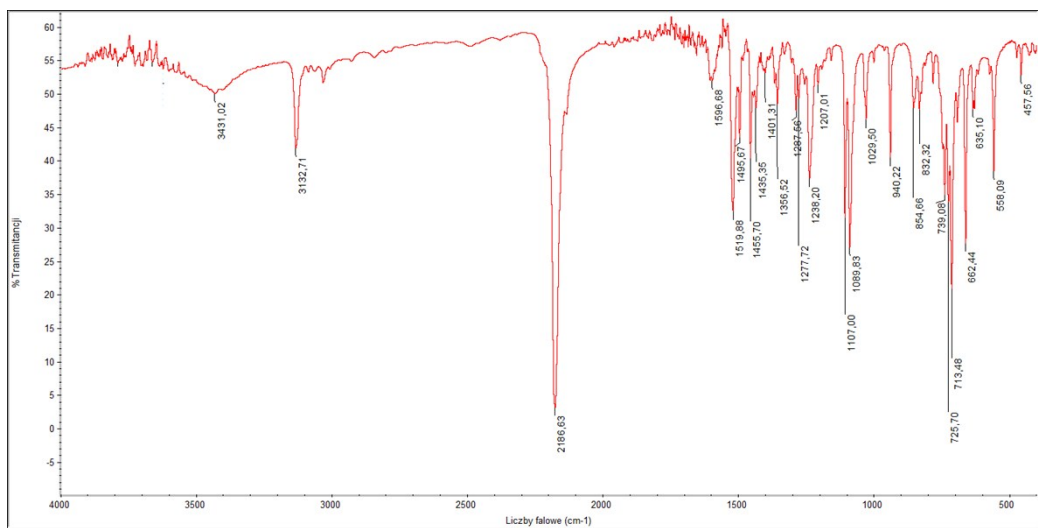

Figure S3. IR spectra of 1

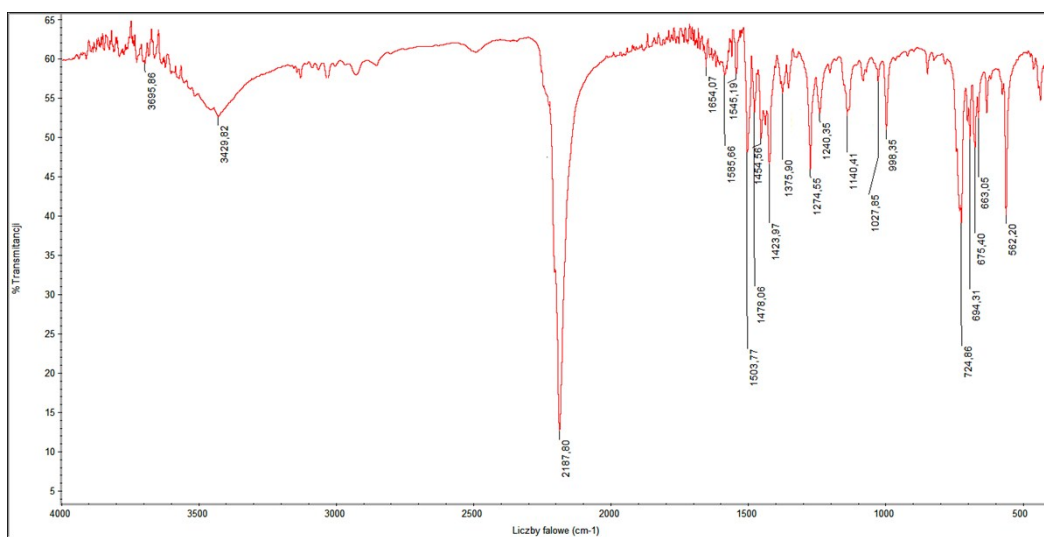

Figure S4. IR spectra of 2

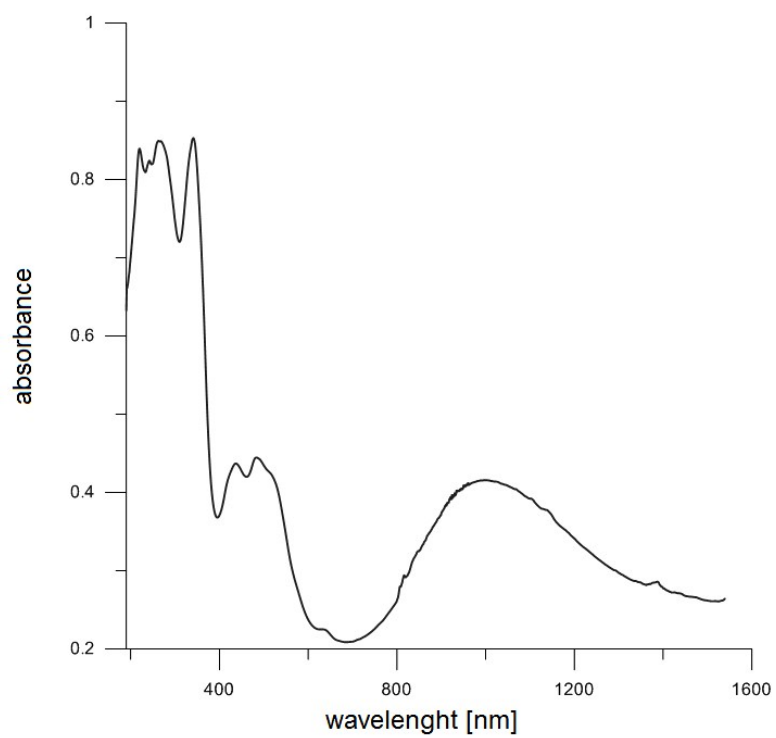

**Figure S5.** UV-Vis-NIR spectra for **1**

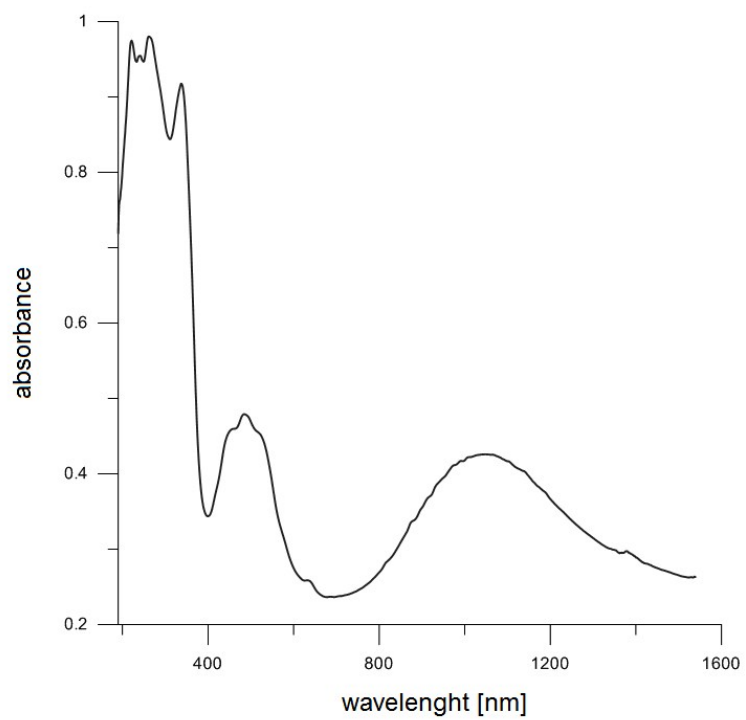

**Figure S6.** UV-Vis-NIR spectra for **2**

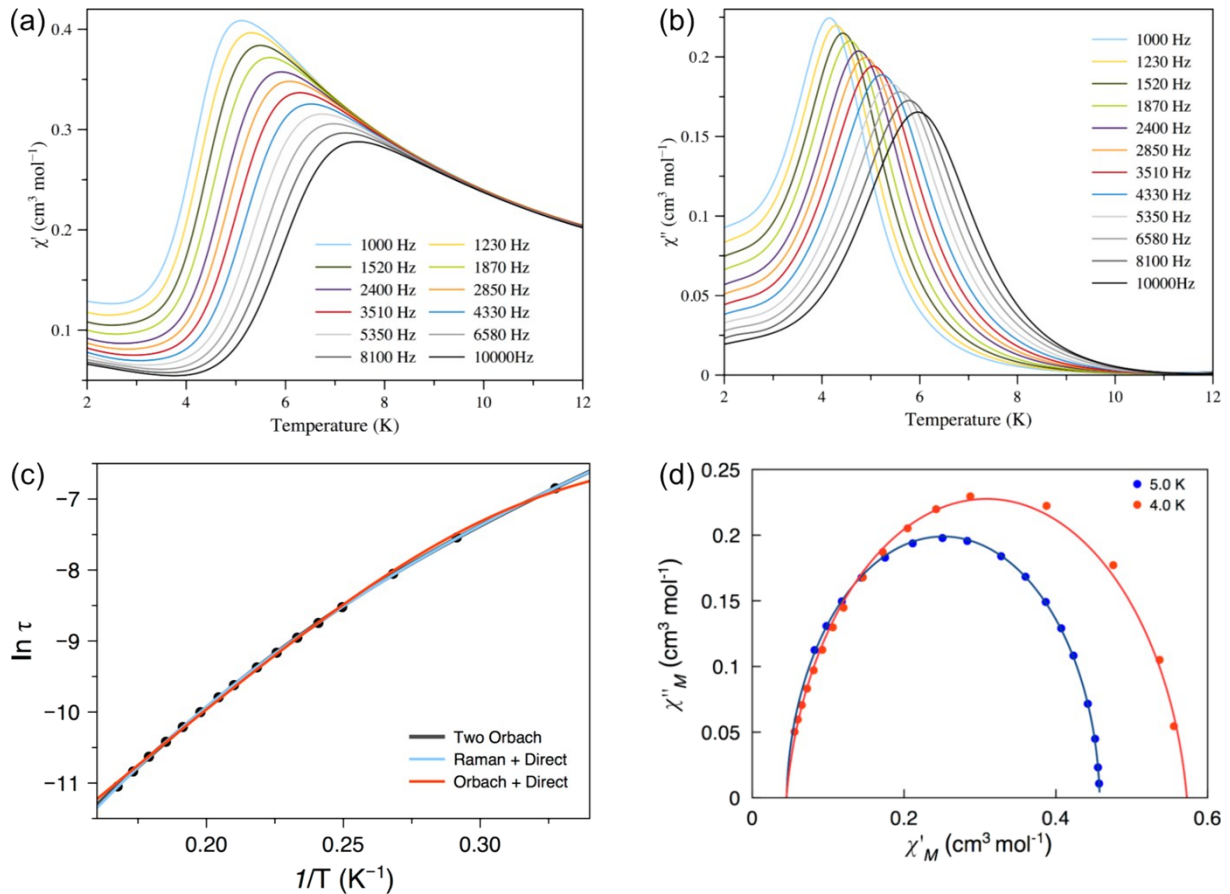

**Figure S7.** Frequency-dependence of the in-phase (a) and out-of-phase (b) ac susceptibilities for **1** under an applied static field  $H_{\text{dc}} = 1000$  G with a  $\pm 5.0$  G oscillating field at frequencies in the range 1.0-10 kHz. (c) Arrhenius plot ( $\infty$ ) showing the best fits (solid lines) to three approaches: one with two Orbach processes (black), another one with one Raman plus one direct (blue), and the last one with one Orbach plus direct (red) relaxation processes. (d) Cole-Cole plots at 5.0 and 4.0 K.

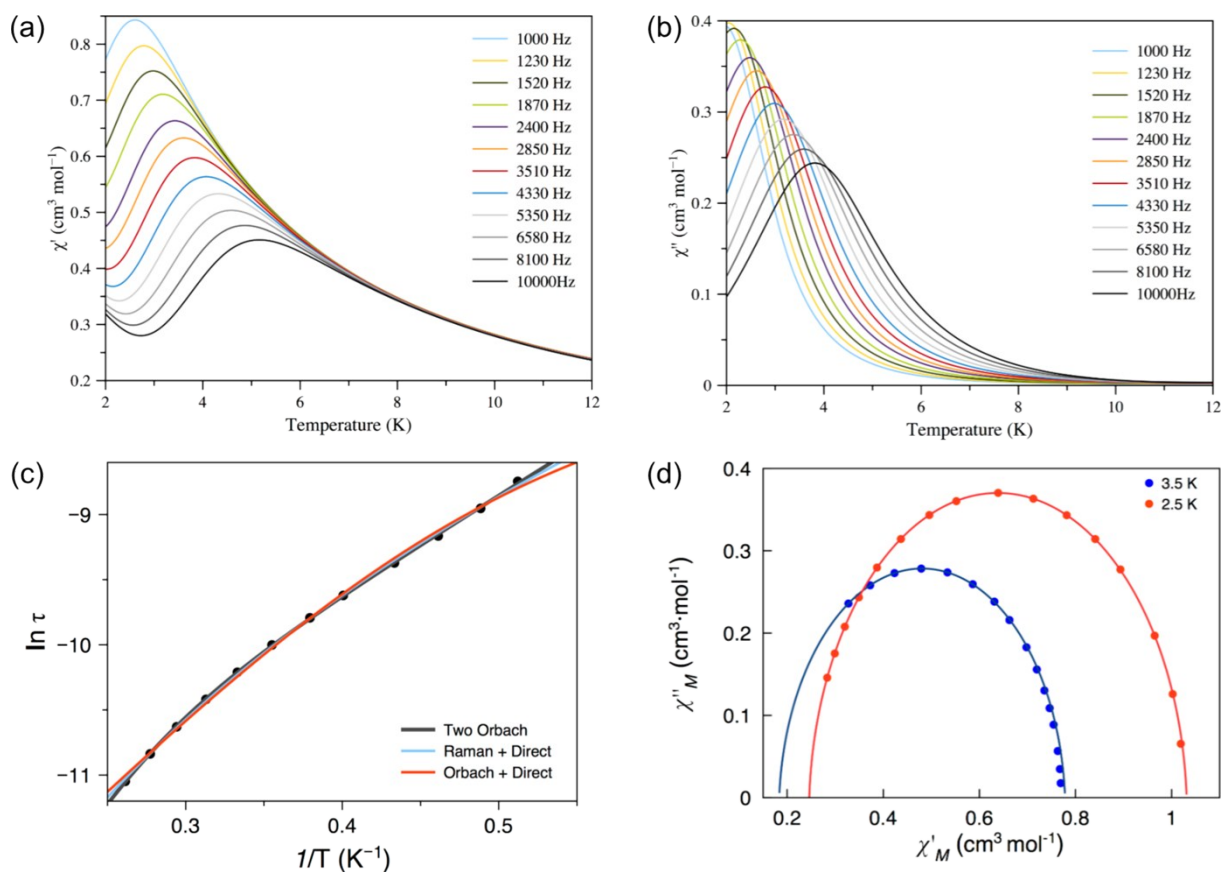

**Figure S8.** Frequency-dependence of the in-phase (a) and out-of-phase (b) ac susceptibilities for **2** under an applied static field  $H_{dc} = 1000$  G with a  $\pm 5.0$  G oscillating field at frequencies in the range 1.0-10 kHz. (c) Arrhenius plot ( $\infty$ ) showing the best fits (solid lines) to three approaches: one with two Orbach processes (black), another one with one Raman plus one direct (blue), and the last one with one Orbach plus direct (red) relaxation processes. (d) Cole-Cole plots at 3.5 and 2.5 K.

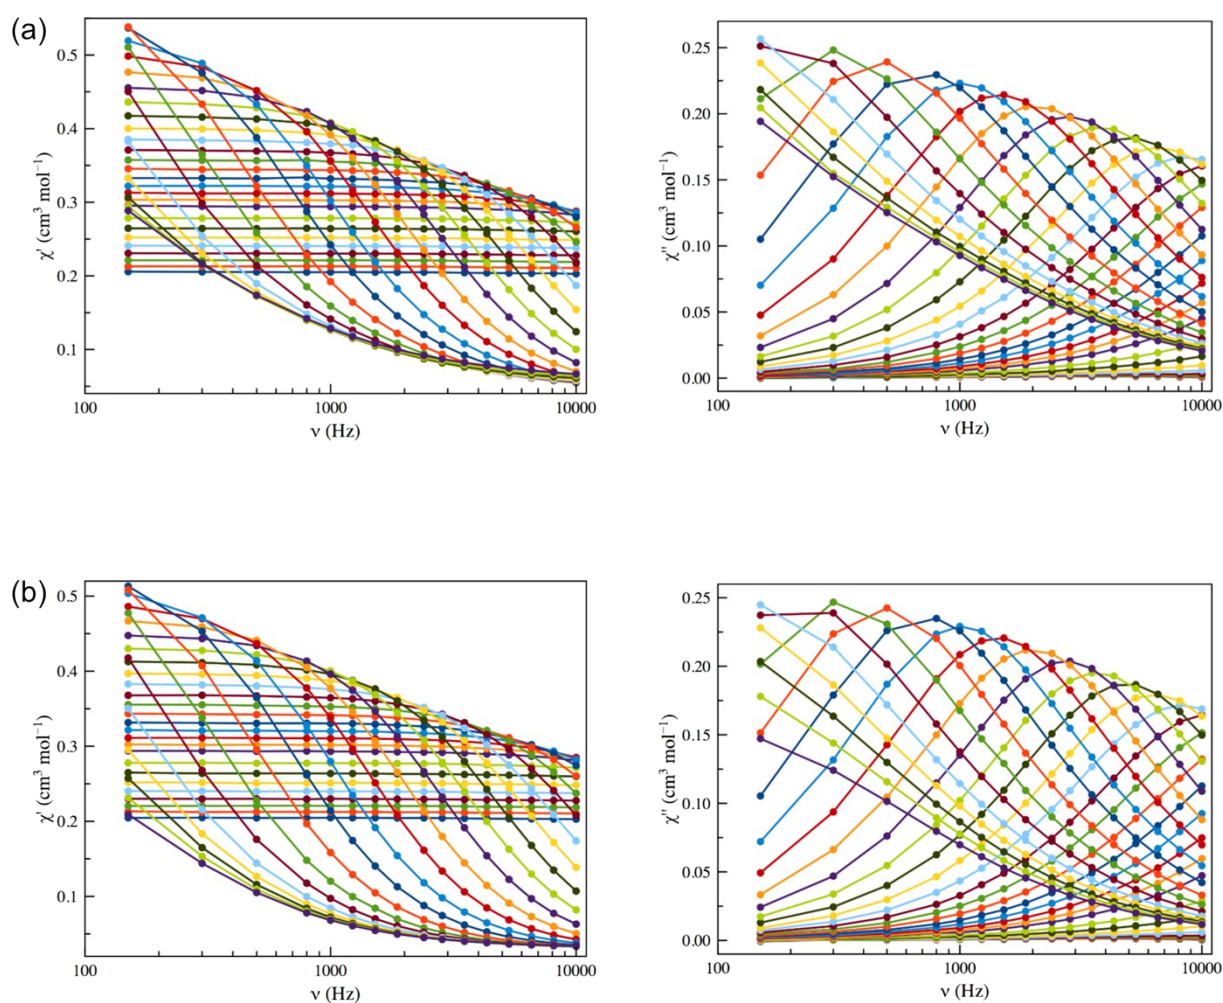

**Figure S9.** Frequency-dependence of the in-phase (left) and out-of-phase (right) ac susceptibilities for **1** under applied static fields  $H_{dc} = 1000$  (a) and 2500 G (b) with a  $\pm 5.0$  G oscillating field at temperatures in the range 2.0-12 K. Above and below 8 K, the intervals of the temperature are 0.5 and 0.25 K, respectively.



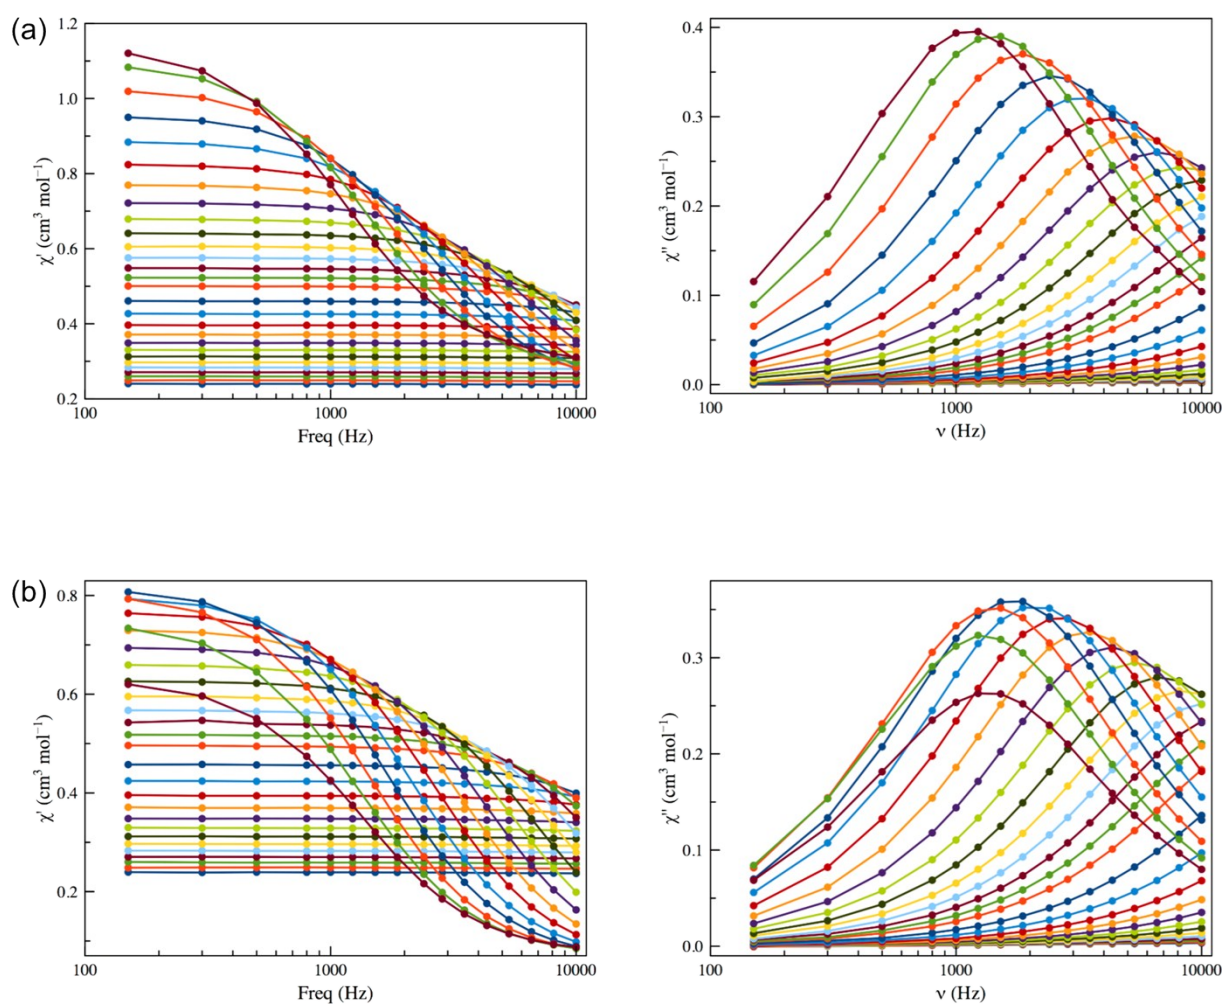

**Figure S10.** Frequency-dependence of the in-phase (left) and out-of-phase (right) ac susceptibilities for **2** under applied static fields  $H_{dc} = 1000$  (a) and 2500 G (b) with a  $\pm 5.0$  G oscillating field at temperatures in the range 2.0-12 K. Above and below 5.5 K, the intervals of the temperature are 0.5 and 0.25 K, respectively.

**Table S1.** Selected magneto-structural parameters for mononuclear six-coordinate cobalt(II) complexes.

| Compound                                                                                   | Co–N <sub>L</sub> [Å]                                                                                                                                         | U <sub>eff</sub> [K] | τ [s]                   | D [cm <sup>-1</sup> ] | E [cm <sup>-1</sup> ] | Ref. |
|--------------------------------------------------------------------------------------------|---------------------------------------------------------------------------------------------------------------------------------------------------------------|----------------------|-------------------------|-----------------------|-----------------------|------|
| [Co(L <sup>1</sup> ) <sub>6</sub> ][BPh <sub>4</sub> ] <sub>2</sub> ·0.3CH <sub>3</sub> CN | Co(1)–N(1)= 2.150;<br>Co(1)–N(1)a= 2.150<br>Co(1)–N(3)= 2.183;<br>Co(1)–N(3)a= 2.183<br>Co(1)–N(7)= 2.177;<br>Co(1)–N(7)a= 2.177                              | 21.6                 | 1.5 · 10 <sup>-6</sup>  | –                     | –                     | 1    |
| [Co(L <sup>1</sup> ) <sub>6</sub> ][NO <sub>3</sub> ] <sub>2</sub>                         | Co(1)–N(1)= 2.162                                                                                                                                             | 6.3                  | 4.5 · 10 <sup>-5</sup>  | –                     | –                     | 1    |
| [Co(L <sup>2</sup> )(OAc)Y(NO <sub>3</sub> ) <sub>2</sub> ]                                | Co(1)–N(12)=<br>2.257(3); Co(1)–<br>N(16)= 2.181(4)<br>Co(1)–N(20)=<br>2.242(3); Co(1)–O(1)=<br>2.036(4)<br>Co(1)–O(5)= 2.185(3);<br>Co(1)–O(25)=<br>2.068(2) | 22.58                | 8.9 · 10 <sup>-7</sup>  | –                     | –                     | 2    |
| [Co(L <sup>3</sup> ) <sub>2</sub> (L4) <sub>2</sub> ]                                      | Co(1)–N(1)= 2.209;<br>Co(1)–N(1)a= 2.209<br>Co(1)–O(1)= 2.001;<br>Co(1)–O(1)= 2.001<br>Co(1)–O(1)a= 2.001;<br>Co(1)–O(2)= 2.034                               | –                    | –                       | +74                   | 1.21                  | 3    |
| [Co(L <sup>3</sup> ) <sub>2</sub> (L5)]                                                    | Co(1)–N(1)= 2.110(4);<br>Co(1)–N(2)= 2.115(3)<br>Co(1)–O(1)= 2.071(2);<br>Co(1)–O(2)= 2.012(3)<br>Co(1)–O(3)= 2.069(3);<br>Co(1)–O(4)= 2.065(3)               | –                    | –                       | +24                   | –1.89                 | 3    |
| [Co(L <sup>6</sup> ) <sub>2</sub> ·2ClO <sub>4</sub>                                       | Co(1)–N(1)= 2.194(3);<br>Co(1)–N(2)= 2.056(3)<br>Co(1)–N(3)= 2.225(3);<br>Co(1)–N(4)= 2.204(3)<br>Co(1)–N(5)= 2.070(3);<br>Co(1)–N(6)= 2.187(3)               | 14.8                 | 7.18 · 10 <sup>-7</sup> | 61.1                  | –5.5                  | 4    |
| [Co(L <sup>7</sup> ) <sub>2</sub> ·2ClO <sub>4</sub>                                       | Co(1)–N(1)= 2.169(2);<br>Co(1)–N(2)= 2.059(2)<br>Co(1)–N(3)= 2.174(2);<br>Co(1)–N(4)= 2.160(2)<br>Co(1)–N(5)= 2.066(2);<br>Co(1)–N(6)= 2.147(2)               | 27.3                 | 2.06 · 10 <sup>-8</sup> | 68.1                  | –5.7                  | 4    |
| [Co(L <sup>7</sup> ) <sub>2</sub> ·2ClO <sub>4</sub> ·MeOH                                 | Co(1)–N(1)= 2.201(3);<br>Co(1)–N(2)= 2.060(3)<br>Co(1)–N(3)= 2.160(4);<br>Co(1)–N(4)= 2.166(4)<br>Co(1)–N(5)= 2.051(3);<br>Co(1)–N(6)= 2.182(3)               | 22.6                 | 3.44 · 10 <sup>-7</sup> | 56.4                  | –10.5                 | 4    |
| [Co(L <sup>8</sup> ) <sub>2</sub> ·2ClO <sub>4</sub>                                       | Co(1)–N(1)= 2.188(3);<br>Co(1)–N(2)= 2.072(3)<br>Co(1)–N(3)= 2.234(3);<br>Co(1)–N(4)= 2.191(3)<br>Co(1)–N(5)= 2.060(3);<br>Co(1)–N(6)= 2.178(3)               | 30.8                 | 2.07 · 10 <sup>-7</sup> | –66.4                 | 10.2                  | 4    |
| [Co(L <sup>9</sup> ) <sub>2</sub> ·2ClO <sub>4</sub> ·MeCN                                 | Co(1)–N(1)= 2.144(5);<br>Co(1)–N(2)= 2.078(5)                                                                                                                 | 20.4                 | 4.95 · 10 <sup>-7</sup> | 62.9                  | –2.4                  | 4    |

|                                                                              |                                                                                                                                                     |       |                         |                                    |      |    |
|------------------------------------------------------------------------------|-----------------------------------------------------------------------------------------------------------------------------------------------------|-------|-------------------------|------------------------------------|------|----|
|                                                                              | Co(1)-N(3)= 2.185(5);<br>Co(1)-N(4)= 2.150(5)<br>Co(1)-N(5)= 2.081(4);<br>Co(1)-N(6)= 2.152(5)                                                      |       |                         |                                    |      |    |
| <b>[Co(L<sup>10</sup>)<sub>2</sub>·2ClO<sub>4</sub>·H<sub>2</sub>O]</b>      | Co(1)-N(1)= 2.195(6);<br>Co(1)-N(2)= 2.064(5)<br>Co(1)-N(3)= 2.172(6);<br>Co(1)-N(4)= 2.179(6)<br>Co(1)-N(5)= 2.055(5);<br>Co(1)-N(6)= 2.176(6)     | 8.0   | 1.67 · 10 <sup>-6</sup> | 74.9                               | -2.7 | 4  |
| <b>[Co(L<sup>11</sup>)<sub>2</sub>(H<sub>2</sub>O)<sub>2</sub>]</b>          | Co(1)-O(1)= 2.054;<br>Co(1)-O(1)a= 2.054<br>Co(1)-O(2)= 2.045;<br>Co(1)-O(2)a= 2.045<br>Co(1)-O(3)= 2.199;<br>Co(1)-O(3)a= 2.199                    | 14-17 | -                       | 57                                 | 17   | 5  |
| <b>[Co(L<sup>12</sup>)<sub>2</sub>(tcm)<sub>2</sub>]</b>                     | Co(1)-N(1)= 2.133;<br>Co(1)-N(1)a= 2.133<br>Co(1)-N(5)= 2.109;<br>Co(1)-N(5)a= 2.109<br>Co(1)-N(10)=2.125;<br>Co(1)-N(10)a=2.125                    | 86.2  | 1.37 · 10 <sup>-9</sup> | 48.2                               | 13   | 6  |
| <b>[Co(SCN)<sub>2</sub>(L<sup>13</sup>)]</b>                                 | Co(1)-N(1)= 2.187;<br>Co(1)-N(1)a= 2.187<br>Co(1)-N(4)= 2.162;<br>Co(1)-N(4)a= 2.162<br>Co(1)-N(7)= 2.092;<br>Co(1)-N(7)a= 2.092                    | 89    | 2.3 · 10 <sup>-10</sup> | -                                  | -    | 7  |
| <b>[Co(L<sup>14</sup>)<sub>2</sub>]</b>                                      | Co(1)-N(2)= 2.146;<br>Co(1)-N(2)a= 2.146<br>Co(1)-N(4)= 2.151;<br>Co(1)-N(4)a= 2.151<br>Co(1)-N(6)= 2.133;<br>Co(1)-N(6)a= 2.133                    | 38.59 | 1.44 · 10 <sup>-7</sup> | -                                  | 36.8 | 8  |
| <b>α-[Co(L<sup>15</sup>)(PhCOO)<sub>2</sub>]</b>                             | Co(1)-N(1)= 2.116(2);<br>Co(1)-N(2)= 2.097(2)<br>Co(1)-O(1)= 2.048(2);<br>Co(1)-O(2)= 2.313(2)<br>Co(1)-O(3)= 2.085(2);<br>Co(1)-O(4)= 2.215(2)     | 22.1  | 6.51 · 10 <sup>-7</sup> | -                                  | -    | 9  |
| <b>β-[Co(L<sup>15</sup>)(PhCOO)<sub>2</sub>]</b>                             | Co(1)-N(1)= 2.116(2);<br>Co(1)-N(2)= 2.097(2)<br>Co(1)-O(1)= 2.048(2);<br>Co(1)-O(2)= 2.313(2)<br>Co(1)-O(3)= 2.085(2);<br>Co(1)-O(4)= 2.215(2)     | 17.1  | 8.52 · 10 <sup>-7</sup> | +58.7                              | -    | 9  |
| <b>[Co(L<sup>16</sup>)<sub>3</sub>(BC<sub>6</sub>H<sub>5</sub>)Cl]</b>       | Co(1)-N(1)= 1.928(2);<br>Co(1)-N(2)= 1.919(2)<br>Co(1)-N(3)= 2.071(2);<br>Co(1)-N(4)= 2.023(2)<br>Co(1)-N(5)= 1.975(2);<br>Co(1)-N(6)= 2.031(1)     | 102   | -                       | large<br>negative<br>value of<br>D | -    | 10 |
| <b>[Co(L<sup>17</sup>)<sub>2</sub>(L<sup>18</sup>)<sub>2</sub>]</b>          | -                                                                                                                                                   | -     | -                       | +24.17                             | 6.90 | 11 |
| <b>[Co(L<sup>19</sup>)<sub>2</sub>][Co(NCO)<sub>4</sub>·2H<sub>2</sub>O]</b> | Co(1)-N(1)= 1.877(3);<br>Co(1)-N(3)= 2.011(3)<br>Co(1)-N(5)= 1.997(3) ;<br>Co(1)-N(7)= 1.922(3)<br>Co(1)-N(9)=<br>2.123(3);Co(1)-N(11)=<br>2.102(3) | 11.7  | 2.2 · 10 <sup>-9</sup>  | 4.30(3)                            | -    | 12 |

|                                                                                                       |                                                                                                                                                                                                                                                                                                                          |         |                              |        |      |    |
|-------------------------------------------------------------------------------------------------------|--------------------------------------------------------------------------------------------------------------------------------------------------------------------------------------------------------------------------------------------------------------------------------------------------------------------------|---------|------------------------------|--------|------|----|
| <b>Et<sub>4</sub>N[Co(L<sup>20</sup>)<sub>3</sub>]</b>                                                | Co(1)-O(1)= 2.077(2);<br>Co(1)-O(2)= 2.078(2)<br>Co(1)-O(3)= 2.053(1);<br>Co(1)-O(4)= 2.084(2)<br>Co(1)-O(5)= 2.077(2);<br>Co(1)-O(6)= 2.047(1)                                                                                                                                                                          | 20.6(5) | 6.4(9) · 10 <sup>-7</sup>    | +117.8 | –    | 13 |
| <b>[Co(L<sup>21</sup>)<sub>2</sub>(NCS)<sub>2</sub>]</b>                                              | Co(1)-N(1)= 2.041(4);<br>Co(1)-N(2)= 2.038(3)<br>Co(1)-N(3)= 2.188(3);<br>Co(1)-N(4)= 2.275(4)<br>Co(1)-N(5)= 2.255(3);<br>Co(1)-N(6)= 2.194(3)                                                                                                                                                                          | 17      | (3.0–4.4) · 10 <sup>-7</sup> | +98    | +8.4 | 14 |
| <b>[Co(oda)(L<sup>22</sup>)]</b>                                                                      | Co(1)-N(2)= 2.152(5);<br>Co(1)-N(4)= 2.040(6)<br>Co(1)-N(5)= 2.137(6);<br>Co(1)-O(1)= 2.086(6)<br>Co(1)-O(2)= 2.077(5);<br>Co(1)-O(5)= 2.060(6)                                                                                                                                                                          | 4.2     | 2.5 · 10 <sup>-5</sup>       | -7.44  | –    | 15 |
| <b>[Co(L<sup>23</sup>)<sub>2</sub>]<sub>2</sub>[Co(NCS)<sub>4</sub>]<br/>·dmsO·H<sub>2</sub>O</b>     | Co(1)-N(1)= 1.929(7);<br>Co(1)-N(2)= 1.888(5)<br>Co(1)-N(3)= 1.943(8);<br>Co(1)-N(6)= 1.947(5)<br>Co(1)-N(7)= 1.908(5);<br>Co(1)-N(8)= 1.942(5)<br><br>Co(2)-N(11)=<br>1.921(8); Co(2)-<br>N(12)= 1.903(5)<br>Co(2)-N(13)=<br>1.956(7); Co(2)-<br>N(16)= 1.931(5)<br>Co(2)-N(17)=<br>1.897(5); Co(2)-<br>N(18)= 1.927(5) | –       | –                            | 34.7   | –    | 16 |
| <b>[Co(L<sup>24</sup>)<sub>4</sub>Cl<sub>2</sub>]</b>                                                 | –                                                                                                                                                                                                                                                                                                                        | –       | –                            | +106   | –    | 17 |
| <b>[Co(L<sup>24</sup>)<sub>4</sub>(SCN)<sub>2</sub>]</b>                                              | –                                                                                                                                                                                                                                                                                                                        | 27.7    | 1.16 · 10 <sup>-6</sup>      | +90.5  | –    | 17 |
| <b>[Co(L<sup>25</sup>)<sub>2</sub>(py)<sub>2</sub>(H<sub>2</sub>O)<sub>2</sub>]<br/>(polymorph 1)</b> | Co(1)-N(1)= 2.151;<br>Co(1)-N(2)= 2.130<br>Co(1)-O(1)= 2.109;<br>Co(1)-O(1)= 2.109<br>Co(1)-O(1w)= 2.098;<br>Co(1)-O(1w)= 2.098                                                                                                                                                                                          | ~20     | 1.37 · 10 <sup>-7</sup>      | +91.5  | –    | 18 |
| <b>[Co(L<sup>25</sup>)<sub>2</sub>(py)<sub>2</sub>(H<sub>2</sub>O)<sub>2</sub>]<br/>(polymorph 2)</b> | Co(1)-N(1)= 2.151;<br>Co(1)-N(2)= 2.151<br>Co(1)-O(1)= 2.136;<br>Co(1)-O(1)= 2.136<br>Co(1)-O(1w)= 2.082;<br>Co(1)-O(1w)= 2.082                                                                                                                                                                                          | ~20     | 3.4 · 10 <sup>-8</sup>       | +117.4 | –    | 18 |
| <b>[Co(L<sup>26</sup>)<sub>2</sub>]</b>                                                               | Co(1)-N(1)=2.070(3);<br>Co(1)-N(1)a=2.070(3)<br>Co(1)-N(3)= 2.159(3);<br>Co(1)-N(3)a= 2.159(3)<br>Co(1)-O(1)= 2.071(2);<br>Co(1)-O(1)a= 2.071(2)                                                                                                                                                                         | –       | –                            | 36.7   | 2.0  | 19 |
| <b>[Co(L<sup>27</sup>)<sub>2</sub>L<sup>28</sup>]<br/>·CH<sub>3</sub>CN</b>                           | Co(1)-O(1)= 2.061(4);<br>Co(1)-O(2)= 2.061(4)<br>Co(1)-O(3)= 2.061(4);<br>Co(1)-O(4)= 2.043(4)<br>Co(1)-N(6)= 2.255(4);<br>Co(1)-N(7)= 2.083(4)                                                                                                                                                                          | –       | –                            | 2.7    | –    | 20 |

|                                                                                        |                                                                                                                                                    |         |                                      |       |   |    |
|----------------------------------------------------------------------------------------|----------------------------------------------------------------------------------------------------------------------------------------------------|---------|--------------------------------------|-------|---|----|
| <b>[Co(L<sup>29</sup>)<sub>2</sub>(H<sub>2</sub>O)<sub>2</sub>](tcap)<sub>2</sub></b>  | Co(1)-N(10)= 2.081;<br>Co(1)-N(10)= 2.081<br>Co(1)-N(50)= 2.166;<br>Co(1)-N(50)= 2.166<br>Co(1)-O(1)= 2.102;<br>Co(1)-O(1)= 2.102                  | 44.1    | 1.04 · 10 <sup>-7</sup>              | 36.6  | – | 21 |
| <b>[Co(L<sup>29</sup>)<sub>2</sub>(H<sub>2</sub>O)<sub>2</sub>](nodcm)<sub>2</sub></b> | Co(1)-N(10)= 2.112;<br>Co(1)-N(10)= 2.112<br>Co(1)-N(50)= 2.146;<br>Co(1)-N(50)= 2.146<br>Co(1)-O(1)= 2.118;<br>Co(1)-O(1)= 2.118                  | 12.3    | 2.96 · 10 <sup>-5</sup>              | 39.8  | – | 21 |
| <b>[Co(L<sup>29</sup>)<sub>2</sub>(CH<sub>3</sub>OH)<sub>2</sub>](pcp)<sub>2</sub></b> | Co(1)-N(10)= 2.058;<br>Co(1)-N(10)= 2.058<br>Co(1)-N(50)= 2.151;<br>Co(1)-N(50)= 2.151<br>Co(1)-O(1)= 2.108;<br>Co(1)-O(1)= 2.108                  | –       | –                                    | 36.8  | – | 21 |
| <b>[Co(L<sup>29</sup>)<sub>2</sub>(nca)<sub>2</sub>]</b>                               | Co(1)-N(10)= 2.086;<br>Co(1)-N(10)= 2.086<br>Co(1)-N(50)= 2.144;<br>Co(1)-N(50)= 2.144<br>Co(1)-N(1)= 2.121;<br>Co(1)-N(1)= 2.121                  | 12.0    | 2.19 · 10 <sup>-5</sup>              | 40.0  | – | 21 |
| <b>[Co(L<sup>29</sup>)<sub>2</sub>(NCSe)<sub>2</sub>]</b>                              | Co(1)-N(10)= 2.085;<br>Co(1)-N(10)= 2.085<br>Co(1)-N(50)= 2.165;<br>Co(1)-N(50)= 2.165<br>Co(1)-N(1)= 2.121;<br>Co(1)-N(1)= 2.121                  | 17.0    | 7.76 · 10 <sup>-6</sup>              | 38.2  | – | 21 |
| <b>[Co(L<sup>29</sup>)<sub>2</sub>(ndcm)<sub>2</sub>]</b>                              | Co(1)-N(10)= 2.103;<br>Co(1)-N(10)= 2.103<br>Co(1)-N(50)= 2.142;<br>Co(1)-N(50)= 2.142<br>Co(1)-O(1)= 2.092;<br>Co(1)-O(1)= 2.092                  | 28.5    | 1.63 · 10 <sup>-6</sup>              | –69.7 | – | 21 |
| <b>[Co(L<sup>30</sup>)<sub>2</sub>]</b>                                                | Co(1)-N(1)= 2.036(2);<br>Co(1)-N(2)= 2.040(2)<br>Co(1)-O(1)= 2.146(1);<br>Co(1)-O(2)= 2.078(1)<br>Co(1)-O(3)= 2.185(1);<br>Co(1)-O(4)= 2.158(1)    | 44.1(8) | 2.8(4) · 10 <sup>-9</sup>            | –     | – | 22 |
| <b>[Co(L<sup>31</sup>)<sub>3</sub>][CoBr<sub>4</sub>]</b>                              | Co(1)-O(1)= 2.081(3);<br>Co(1)-O(2)= 2.125(3)<br>Co(1)-O(3)= 2.103(3);<br>Co(1)-O(4)= 2.093(3)<br>Co(1)-O(5)= 2.102(3);<br>Co(1)-O(6)= 2.101(3)    | –       | –                                    | 129   | 3 | 23 |
| <b>[Co(L<sup>32</sup>)<sub>2</sub>][ClO<sub>4</sub>]<sub>2</sub></b>                   | Co(1)-N(2)= 2.112(3);<br>Co(1)-N(2)a= 2.112(3)<br>Co(1)-N(2)= 2.107(3);<br>Co(1)-N(2)a= 2.107(3)<br>Co(1)-N(2)= 2.107(3);<br>Co(1)-N(2)a= 2.107(3) | 30.6(1) | 2.0(2)–<br>3.3(7) · 10 <sup>-7</sup> | –     | – | 24 |
| <b>[Co(L<sup>32</sup>)<sub>2</sub>][BPh<sub>4</sub>]<sub>2</sub>·2MeCN</b>             | Co(1)-N(2)= 2.110(1);<br>Co(1)-N(2)a= 2.110(1)<br>Co(1)-N(2)= 2.104(1);<br>Co(1)-N(2)a= 2.104(1)<br>Co(1)-N(2)= 2.101(1);<br>Co(1)-N(2)a= 2.101(1) | 44.7(6) | 1.0(1)–<br>1.5(2) · 10 <sup>-7</sup> | –     | – | 24 |

**L<sup>1</sup>**= imidazole, **L<sup>2</sup>**=N,O Schiff base ligand, **L<sup>4</sup>**= pyridine, **L<sup>5</sup>**= 2,2'-bipyridine; **L<sup>6</sup>**=2,6-bis(oxazo-1-yl)pyridine, **L<sup>7</sup>**=2,6-bis(1,1'-dimethyl-oxazo-1-yl)pyridine; **L<sup>8</sup>**= 4-methylphenyl-2,6-bis(oxazo-1-yl)pyridine; **L<sup>9</sup>**=4-methylphenyl-2,6-bis(1,1'-dimethyl-oxazo-1-yl)pyridine; **L<sup>10</sup>**=4-pyridine-2,6-bis(1,1'-dimethyl-oxazo-1-yl)pyridine; **L<sup>11</sup>**= acetylacetonate; **L<sup>12</sup>**= 4-amino-3,5-bis(2-pyridyl)-1,2,4-triazole; **L<sup>13</sup>**=4-( $\alpha$ -diazobenzyl)pyridine; **L<sup>14</sup>**= bis-hydridotris(3,5-dimethylpyrazole); **L<sup>15</sup>**= neocuproine; **L<sup>16</sup>**= pyrazoloxime; **L<sup>17</sup>**=1,1,1,5,5,5-hexafluoro-2,4-pentanedione; **L<sup>18</sup>**=4-methylpyridine; **L<sup>19</sup>**= 2,3,5,6-tetrakis(2-pyridyl)pyrazine; **L<sup>20</sup>**= hexafluoroacetylacetonate; **L<sup>21</sup>**= 2,9-dimethyl-1,10-phenanthroline; **L<sup>22</sup>**= 4'-azido-2,2':6',2''-terpyridine; **L<sup>23</sup>**=bis(2-pyrimidylcarbonyl)amide; **L<sup>24</sup>**=4-benzylpyridine; **L<sup>25</sup>**=3,5-dinitrobenzoic acid; **L<sup>26</sup>**=o-[(1H-imidazol-2-yl)methylideneamino]phenol; **L<sup>27</sup>**= hexafluoroacetylacetonate; **L<sup>28</sup>**= O-donor ditopic ligand; **L<sup>29</sup>**= 4-amino-3,5-bis(2-pyridyl)-1,2,4-triazole; **L<sup>30</sup>**= 2,6-pyridinedimethanol; **L<sup>31</sup>**=bis(diphenylphosphano)oxido)methane; **L<sup>32</sup>**= tris(pyrazol-1-yl)methane

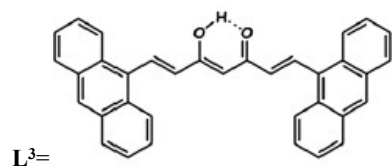

## References:

1. L. Chen, J. Zhou, H.-H. Cui, A.-H. Yuan, Z. Wang, Y.-Q. Zhang, Z.-W. Ouyang and Y. Song, *Dalton Trans.*, 2018, **47**, 2506.
2. E. Colacio, J. Ruiz, E. Ruiz, E. Cremades, J. Krzystek, S. Carretta, J. Cano, T. Guidi, W. Wernsdorfer and E. K. Brechin, *Angew. Chem., Int. Ed.*, 2013, **52**, 9130.
3. R. Diaz-Torres, M. Menelaou, O. Roubeau, A. Sorrenti, G. Brandariz-de-Pedro, E. Carolina Sañudo, S.J. Teat, J. Fraxedas, E. Ruiz and N. Aliaga-Alcalde, *Chem. Sci.*, 2016, **7**, 2793.
4. Z.-Y. Ding, Y.-S. Meng, Y. Xiao, Y.-Q. Zhang, Y.-Y. Zhu and S. Gao, *Inorg. Chem. Front.*, 2017, **4**, 1909.
5. S. Gómez-Coca, A. Urtizberea, E. Cremades, P. J. Alonso, A. Camón, E. Ruiz, F. Luis, *Nat. Commun.*, 2014, **5**, 4300.
6. R. Herchel, L. Váhovská, I. Potočňák and Z. Trávníček, *Inorg. Chem.*, 2014, **53**, 5896.
7. S. Karasawa, G. Zhou, H. Morikawa, and N. Koga, *J. Am. Chem. Soc.*, 2003, **125**, 13676.
8. J. Li, Y. Han, F. Cao, R.-M. Wei, Y.-Q. Zhang and Y. Song, *Dalton Trans.*, 2016, **45**, 9279.
9. I. Nemeč, R. Herchel and Z. Trávníček, *Dalton Trans.*, 2018, **47**, 1614.
10. V. V. Novikov, A. A. Pavlov, Y. V. Nelyubina, M.E. Boulon, O. A. Varzatskii, Y. Z. Voloshin and R. E.P. Winpenny, *J. Am. Chem. Soc.*, 2015, **137**, 9792.
11. G. Novitchi, S. Jiang, S. Shova, F. Rida, I. Hlavička, M. Orlita, W. Wernsdorfer, R. Hamze, C. Martins, N. Suaud, N. Guihéry, A.-L. Barra and C. Train, *Inorg. Chem.*, 2017, **56**, 14809.
12. J. Palion-Gazda, B. Machura, R. Kruszynski, T. Grancha, N. Moliner, F. Lloret and M. Julve, *Inorg. Chem.*, 2017, **56**, 6281.
13. A. V. Pali, D. V. Korchagin, E. A. Yureva, A. V. Akimov, E. Ya. Misochko, G. V. Shilov, Artem D. Talantsev, Roman B. Morgunov, Sergey M. Aldoshin and Boris S. Tsukerblat, *Inorg. Chem.*, 2016, **55**, 9696.
14. J. Vallejo, I. Castro, R. Ruiz-García, J. Cano, M. Julve, F. Lloret, G. De Munno, W. Wernsdorfer and E. Pardo, *J. Am. Chem. Soc.*, 2012, **134**, 15704.
15. C. Plenk, J. Krause and E. Rentschler, *Eur. J. Inorg. Chem.*, 2015, 370.
16. R. Rabelo, A. K. Valdo, C. Robertson, J. A. Thomas, H. O. Stumpf, F. T. Martins, E. F. Pedroso, M. Julve, F. Lloret and D. Cangussu, *New J. Chem.*, 2017, **41**, 6911.
17. C. Rajnak, J. Titiš, J. Moncol, F. Renz and R. Boča, *Eur. J. Inorg. Chem.*, 2017, 1520.
18. S. Roy, I. Oyarzabal, J. Vallejo, J. Cano, E. Colacio, A. Bauza, A. Frontera, A. M. Kirillov, M. G. B. Drew and S. Das, *Inorg. Chem.*, 2016, **55**, 8502.
19. D. Sertphon, K.S. Murray, W. Phonsri, J. Jover, E. Ruiz, S. G. Telfer, A. Alkaş, P. Harding and D.J. Harding, *Dalton Trans.*, 2018, **47**, 859.
20. O. Stetsiuk, A. El-Ghayoury, F. Lloret, M. Julve and N. Avarvari, *Eur. J. Inorg. Chem.*, 2018, 449.
21. L. Váhovská, S. Vitushkina, I. Potočňák, Z. Trávníček and R. Herchel, *Dalton Trans.*, 2018, **47**, 1498.
22. D. Valigura, C. Rajnak, J. Moncol, J. Titiš and R. Boča, *Dalton Trans.*, 2017, **46**, 10950.
23. F. Varga, C. Rajnak, J. Titiš, J. Moncol and R. Boča, *Dalton Trans.*, 2017, **46**, 4148.
24. Y.-Z. Zhang, S. Gomez-Coca, A. J. Brown, M.R. Saber, X. Zhang and K. R. Dunbar, *Chem. Sci.*, 2016, **7**, 6519.

**Table S2.** Energy of all calculated excited states and their contributions to the  $D$  and  $E$  values for the optimized geometries **1** and **2** obtained from CASSCF/NEVPT2 calculations.

| Compound 1          |     |        |         | Compound 2          |     |        |         |
|---------------------|-----|--------|---------|---------------------|-----|--------|---------|
| Energy <sup>a</sup> | $S$ | $D^a$  | $E^a$   | Energy <sup>a</sup> | $S$ | $D^a$  | $E^a$   |
| 961.4               | 4   | 30.143 | 30.025  | 254.2               | 4   | 52.644 | 52.644  |
| 1804.9              | 4   | 16.015 | -16.104 | 874.7               | 4   | 36.415 | -36.420 |
| 10590.8             | 4   | 3.998  | -2.882  | 9493.7              | 4   | 4.934  | -5.254  |
| 11068.6             | 4   | 2.844  | 2.809   | 9859.4              | 4   | 0.054  | 0.030   |
| 11477.2             | 4   | 0.147  | -0.080  | 11623.6             | 4   | -9.353 | -0.030  |
| 22446.0             | 4   | 0.001  | -0.001  | 21575.6             | 4   | 0.001  | 0.001   |
| 23584.2             | 4   | 0.071  | 0.014   | 22742.5             | 4   | 0.084  | 0.084   |
| 24042.9             | 4   | 0.074  | -0.036  | 24357.5             | 4   | 0.004  | -0.003  |
| 25950.5             | 4   | 0.005  | 0.004   | 24526.5             | 4   | 0.048  | -0.049  |
| 9321.5              | 2   | 10.813 | 0.355   | 8366.2              | 2   | -6.136 | -6.136  |
| 10438.5             | 2   | 0.572  | -0.147  | 10721.8             | 2   | 2.906  | 0.097   |
| 19031.8             | 2   | -0.022 | -0.016  | 17403.7             | 2   | 0.006  | -0.000  |
| 19721.4             | 2   | -0.658 | -0.441  | 18945.8             | 2   | -0.009 | -0.009  |
| 19923.5             | 2   | -0.507 | -0.460  | 19492.6             | 2   | -1.134 | 1.134   |
| 19981.6             | 2   | -0.269 | -0.006  | 19558.0             | 2   | -1.249 | -1.249  |
| 20246.6             | 2   | -0.481 | 0.497   | 20151.2             | 2   | -0.002 | -0.002  |
| 20657.6             | 2   | -0.341 | 0.350   | 20431.3             | 2   | 0.002  | 0.000   |
| 22774.0             | 2   | -0.021 | -0.008  | 22726.2             | 2   | -0.230 | 0.239   |
| 23836.9             | 2   | 3.388  | 0.003   | 22984.8             | 2   | 2.348  | 0.004   |
| 23869.0             | 2   | -0.098 | -0.079  | 23172.2             | 2   | -0.047 | -0.047  |
| 28080.1             | 2   | -0.109 | 0.102   | 27229.5             | 2   | -0.000 | -0.000  |
| 30361.8             | 2   | -0.170 | 0.231   | 29510.2             | 2   | -0.000 | 0.010   |
| 30884.3             | 2   | -0.102 | -0.102  | 30121.4             | 2   | -0.004 | -0.004  |
| 31201.8             | 2   | 0.000  | -0.001  | 31253.2             | 2   | 0.479  | 0.000   |



|         |   |        |        |         |   |        |        |
|---------|---|--------|--------|---------|---|--------|--------|
| 32528.6 | 2 | -0.324 | 0.233  | 31659.2 | 2 | -0.665 | 0.667  |
| 32745.3 | 2 | -0.442 | -0.384 | 31911.7 | 2 | -0.003 | 0.003  |
| 33244.1 | 2 | -0.015 | -0.014 | 32719.1 | 2 | -0.493 | -0.493 |
| 33763.4 | 2 | 1.893  | 0.063  | 33611.6 | 2 | 0.967  | 0.019  |
| 34970.2 | 2 | -0.038 | -0.014 | 33779.1 | 2 | -0.836 | -0.839 |
| 36926.8 | 2 | 0.022  | 0.155  | 36015.0 | 2 | 1.412  | 0.006  |
| 37142.4 | 2 | -0.324 | -0.314 | 36775.9 | 2 | -0.404 | 0.423  |
| 37590.5 | 2 | -0.038 | 0.062  | 36842.4 | 2 | -0.003 | -0.003 |
| 39650.3 | 2 | -0.172 | -0.052 | 38823.8 | 2 | -0.090 | -0.090 |
| 39857.0 | 2 | -0.206 | 0.123  | 39387.2 | 2 | -0.000 | -0.000 |
| 40244.7 | 2 | 0.026  | -0.001 | 39550.9 | 2 | -0.000 | 0.000  |
| 40500.1 | 2 | 0.002  | 0.002  | 39668.0 | 2 | -0.006 | 0.009  |
| 40729.8 | 2 | 0.087  | 0.047  | 39745.4 | 2 | -0.228 | -0.228 |
| 44267.1 | 2 | -0.028 | 0.008  | 43772.9 | 2 | -0.114 | 0.122  |
| 44738.3 | 2 | -0.037 | 0.018  | 43852.1 | 2 | -0.003 | 0.001  |
| 45092.9 | 2 | -0.020 | -0.031 | 44999.0 | 2 | 0.189  | 0.001  |
| 47933.3 | 2 | -0.070 | -0.051 | 47101.3 | 2 | -0.061 | -0.061 |
| 48191.0 | 2 | -0.062 | 0.055  | 47542.9 | 2 | -0.000 | -0.000 |
| 48447.2 | 2 | -0.011 | -0.002 | 47761.6 | 2 | -0.063 | 0.063  |
| 48556.2 | 2 | -0.001 | 0.000  | 47780.5 | 2 | -0.001 | -0.001 |
| 66480.1 | 2 | -0.000 | -0.003 | 65771.4 | 2 | 0.045  | 0.002  |
| 67358.4 | 2 | 0.009  | -0.000 | 66864.7 | 2 | -0.000 | -0.000 |
| 67949.0 | 2 | 0.016  | 0.001  | 67031.8 | 2 | -0.001 | 0.001  |
| 68039.6 | 2 | 0.014  | 0.000  | 67366.1 | 2 | 0.003  | 0.000  |
| 68427.2 | 2 | 0.137  | 0.004  | 67615.4 | 2 | -0.084 | -0.084 |

<sup>a</sup>Values in cm<sup>-1</sup>.

**Table S3.** Energies of the low-lying Kramers doublets corresponding to the ground and first excited states, which should be related to those generated from a 1<sup>st</sup> order spin-orbit coupling, for the optimized geometries **1** and **2** obtained from CASSCF/NEVPT2 calculations.

| Compound <b>1</b> |                     | Compound <b>2</b> |                     |
|-------------------|---------------------|-------------------|---------------------|
| Kramers doublet   | Energy <sup>a</sup> | Kramers doublet   | Energy <sup>a</sup> |
| Ground            | 0.0                 | Ground            | 0.0                 |
| 1st               | 136.1               | 1st               | 205.8               |
| 2nd               | 1048.8              | 2nd               | 534.7               |
| 3rd               | 1266.9              | 3rd               | 842.7               |
| 4th               | 2035.4              | 4th               | 1315.1              |
| 5th               | 2122.2              | 5th               | 1411.2              |

<sup>a</sup>Values in cm<sup>-1</sup>.

**Table S4.** Selected ac magnetic data at different applied dc fields for **1** and **2**.

| Compound              | $H_{dc}^a$ | $\tau_{01}^b \times 10^8$ (s)<br>$\tau_{02} \times 10^6$ (s) | $E_{a1}^b$ (cm <sup>-1</sup> )<br>$E_{a2}$ (cm <sup>-1</sup> ) | $A^c$ (s <sup>-1</sup> K <sup>-1</sup> ) | $B^c$ (s <sup>-1</sup> K <sup>-n</sup> ) | $n^c$ |
|-----------------------|------------|--------------------------------------------------------------|----------------------------------------------------------------|------------------------------------------|------------------------------------------|-------|
| Two Orbach model      |            |                                                              |                                                                |                                          |                                          |       |
| <b>1</b>              | 1000       | 2.41                                                         | 27.9                                                           |                                          |                                          |       |
|                       |            | 5.01                                                         | 11.6                                                           |                                          |                                          |       |
|                       | 2500       | 2.49                                                         | 27.8                                                           |                                          |                                          |       |
|                       |            | 5.56                                                         | 11.3                                                           |                                          |                                          |       |
| <b>2</b>              | 1000       | 2.89                                                         | 19.7                                                           |                                          |                                          |       |
|                       |            | 3.36                                                         | 5.2                                                            |                                          |                                          |       |
|                       | 2500       | 0.0007                                                       | 51.1                                                           |                                          |                                          |       |
|                       |            | 1.0                                                          | 8.9                                                            |                                          |                                          |       |
| Raman + Direct model  |            |                                                              |                                                                |                                          |                                          |       |
| <b>1</b>              | 1000       |                                                              |                                                                | 22.1                                     | 0.68                                     | 6.40  |
|                       | 2500       |                                                              |                                                                | 31.3                                     | 0.69                                     | 6.38  |
| <b>2</b>              | 1000       |                                                              |                                                                | -3500.0                                  | 829.4                                    | 3.22  |
|                       | 2500       |                                                              |                                                                | -2600.2                                  | 721.8                                    | 3.12  |
| Orbach + Direct model |            |                                                              |                                                                |                                          |                                          |       |
| <b>1</b>              | 1000       | 7.6                                                          | 22.5                                                           | 216.3                                    |                                          |       |
|                       | 2500       | 7.8                                                          | 22.5                                                           | 223.3                                    |                                          |       |
| <b>2</b>              | 1000       | 80                                                           | 8.5                                                            | 2128.4                                   |                                          |       |
|                       | 2500       | 61                                                           | 10.2                                                           | 703.7                                    |                                          |       |

<sup>a</sup>Applied dc field in G. <sup>b</sup>The values of the pre-exponential factor ( $\tau_0$ ) and activation energy ( $E_a$ ) are calculated through the Arrhenius law (see text). <sup>c</sup>The values of the coefficients of direct ( $A$ ) and Raman ( $B$  and  $n$ ) processes for the relaxation of the magnetization (see text).

**Table S5.** Main parameters extracted from the Cole-Cole plots for **1** and **2**.

| Compound | $H_{dc}^a$ | $\alpha^b$  | $\chi_S^b$ (cm <sup>3</sup> mol <sup>-1</sup> ) | $\chi_T^b$ (cm <sup>3</sup> mol <sup>-1</sup> ) | $\tau^b \times 10^5$ (s) |
|----------|------------|-------------|-------------------------------------------------|-------------------------------------------------|--------------------------|
| <b>1</b> | 1000       | 0.093 (4 K) | 0.573 (4 K)                                     | 0.045 (4 K)                                     | 22.0 (4 K)               |
|          |            | 0.023 (5 K) | 0.458 (5 K)                                     | 0.045 (5 K)                                     | 7.1 (5 K)                |
|          | 2500       | 0.071 (4 K) | 0.555 (4 K)                                     | 0.026 (4 K)                                     | 22.6 (4 K)               |
|          |            | 0.019 (5 K) | 0.450 (5 K)                                     | 0.029 (5 K)                                     | 7.6 (5 K)                |

|   |      |               |               |               |             |
|---|------|---------------|---------------|---------------|-------------|
| 2 | 1000 | 0.038 (2.5 K) | 1.032 (2.5 K) | 0.246 (2.5 K) | 3.9 (2.5 K) |
|   |      | 0.042 (3.5 K) | 0.778 (3.5 K) | 0.183 (3.5 K) | 1.9 (3.5 K) |
|   | 2500 | 0.032 (2.5 K) | 0.807 (2.5 K) | 0.066 (2.5 K) | 8.6 (2.5 K) |
|   |      | 0.032 (3.5 K) | 0.738 (3.5 K) | 0.051 (3.5 K) | 4.2 (3.5 K) |

<sup>a</sup>Applied dc field in G. <sup>b</sup>The values of the  $\alpha$  parameter, adiabatic ( $\chi_S$ ) and isothermal ( $\chi_T$ ) susceptibilities, and relaxation time are calculated from the experimental data at different temperatures through the generalized Debye law (see text).

**Table S6.** XYZ coordinates (in angstroms) for the optimized molecular geometry of **1** using a PBE functional.

| Atom | <i>x</i>  | <i>y</i>  | <i>z</i>  |
|------|-----------|-----------|-----------|
| Co   | -0.001954 | 0.002460  | 0.000675  |
| N    | -0.014889 | -2.142142 | -0.159297 |
| N    | 0.011460  | 2.146873  | 0.160226  |
| N    | -0.299229 | -4.213548 | -0.963953 |
| N    | 0.299442  | 4.218338  | 0.963428  |
| N    | -2.110150 | -0.102301 | 0.313897  |
| N    | 2.106295  | 0.106894  | -0.312170 |
| N    | -4.321655 | -0.017105 | -0.019946 |
| N    | 4.317653  | 0.017460  | 0.021374  |
| N    | 0.369752  | -0.149761 | 2.004394  |
| N    | -0.373313 | 0.153952  | -2.003147 |
| N    | -3.445592 | -2.336942 | -3.680244 |
| N    | 3.443025  | 2.340140  | 3.679781  |
| N    | 1.181110  | -0.502317 | 6.545962  |
| N    | -1.183798 | 0.507019  | -6.544663 |
| C    | 0.087702  | -3.054315 | 0.899493  |
| C    | -0.094042 | 3.058819  | -0.898474 |
| C    | -0.091331 | -4.343595 | 0.412871  |
| C    | 0.087253  | 4.348122  | -0.412759 |
| C    | -0.244997 | -2.871667 | -1.269829 |
| C    | 0.245520  | 2.876570  | 1.269823  |
| C    | -0.572129 | -5.310721 | -1.922301 |
| C    | 0.576560  | 5.315636  | 1.920422  |
| C    | -1.857681 | -6.062672 | -1.616270 |
| C    | 1.863157  | 6.064558  | 1.611271  |
| C    | -1.812103 | -7.329286 | -0.985560 |
| C    | 1.819200  | 7.330421  | 0.978951  |
| C    | -3.003194 | -8.018704 | -0.673962 |
| C    | 3.011228  | 8.016885  | 0.664446  |
| C    | -4.251788 | -7.443287 | -0.990080 |
| C    | 4.259139  | 7.439212  | 0.979168  |
| C    | -4.303167 | -6.182583 | -1.624503 |
| C    | 4.308919  | 6.179236  | 1.615162  |
| C    | -3.114499 | -5.493158 | -1.940323 |
| C    | 3.119312  | 5.492804  | 1.933967  |
| C    | -2.749383 | -0.721996 | 1.394044  |
| C    | 2.746379  | 0.728900  | -1.390462 |
| C    | -4.124253 | -0.677074 | 1.198520  |
| C    | 4.121194  | 0.681353  | -1.195134 |
| C    | -3.082574 | 0.317150  | -0.519901 |
| C    | 3.078095  | -0.316490 | 0.520350  |
| C    | -5.623432 | 0.296533  | -0.653646 |
| C    | 5.618938  | -0.300080 | 0.654061  |
| C    | -6.560593 | -0.897211 | -0.738843 |
| C    | 6.558332  | 0.891722  | 0.742081  |

|   |           |           |           |
|---|-----------|-----------|-----------|
| C | -7.700878 | -0.964617 | 0.097616  |
| C | 7.700814  | 0.957063  | -0.091526 |
| C | -8.582972 | -2.063824 | 0.023024  |
| C | 8.585153  | 2.054284  | -0.014170 |
| C | -8.331170 | -3.106043 | -0.893339 |
| C | 8.333353  | 3.096605  | 0.902070  |
| C | -7.195319 | -3.044194 | -1.730710 |
| C | 7.195259  | 3.036854  | 1.736553  |
| C | -6.310085 | -1.949146 | -1.655634 |
| C | 6.307844  | 1.943765  | 1.658757  |
| C | 0.905684  | 0.100741  | 3.049204  |
| C | -0.909182 | -0.096605 | -3.047976 |
| C | 1.635281  | 0.514093  | 4.176108  |
| C | -1.638258 | -0.510094 | -4.175156 |
| C | 2.630076  | 1.506888  | 3.953620  |
| C | -2.632749 | -1.503343 | -3.953316 |
| C | 1.390753  | -0.035271 | 5.468457  |
| C | -1.393572 | 0.039680  | -5.467311 |
| H | 0.274379  | -2.717355 | 1.923065  |
| H | -0.284189 | 2.721713  | -1.921357 |
| H | -0.106221 | -5.316220 | 0.914042  |
| H | 0.100935  | 5.320614  | -0.914226 |
| H | -0.376557 | -2.484899 | -2.284066 |
| H | 0.380223  | 2.490045  | 2.283736  |
| H | -0.835772 | -7.785272 | -0.744241 |
| H | 0.843441  | 7.788159  | 0.738641  |
| H | -2.954945 | -9.005984 | -0.186359 |
| H | 2.964261  | 9.003627  | 0.175631  |
| H | -5.183893 | -7.978887 | -0.746873 |
| H | 5.191953  | 7.972524  | 0.733661  |
| H | -5.275448 | -5.729867 | -1.878019 |
| H | 5.280662  | 5.724724  | 1.867562  |
| H | -3.171588 | -4.514222 | -2.451024 |
| H | 3.175114  | 4.514523  | 2.446057  |
| H | -2.179023 | -1.152529 | 2.221887  |
| H | 2.176604  | 1.162826  | -2.216945 |
| H | -4.960062 | -1.063874 | 1.789106  |
| H | 4.957568  | 1.068668  | -1.784575 |
| H | -2.935367 | 0.841986  | -1.468366 |
| H | 2.930025  | -0.843990 | 1.467207  |
| H | -7.906162 | -0.143992 | 0.807149  |
| H | 7.905981  | 0.136405  | -0.801049 |
| H | -9.468815 | -2.102490 | 0.677595  |
| H | 9.472692  | 2.091324  | -0.666534 |
| H | -9.021487 | -3.962858 | -0.958681 |
| H | 9.025352  | 3.951897  | 0.969533  |
| H | -6.998698 | -3.848379 | -2.458713 |
| H | 6.998549  | 3.841095  | 2.464467  |
| H | -5.425518 | -1.924220 | -2.318270 |
| H | 5.421589  | 1.920564  | 2.319185  |

|   |           |           |           |
|---|-----------|-----------|-----------|
| H | -6.107824 | 1.119426  | -0.080718 |
| H | 6.101801  | -1.122460 | 0.079109  |
| H | -5.389316 | 0.685229  | -1.668121 |
| H | 5.384240  | -0.690886 | 1.667617  |
| H | 0.295606  | -6.006946 | -1.912892 |
| H | -0.289728 | 6.013664  | 1.912137  |
| H | -0.620664 | -4.842040 | -2.928108 |
| H | 0.626095  | 4.847647  | 2.926500  |

**Table S7.** XYZ coordinates (in angstroms) for the optimized molecular geometry of **2** using a PBE functional.

| Atom | x         | y         | z         |
|------|-----------|-----------|-----------|
| Co   | -0.027665 | 0.025877  | -0.005288 |
| N    | -2.216215 | -0.037112 | -0.007247 |
| N    | -0.064170 | 2.213834  | 0.002011  |
| N    | -4.411451 | 0.113908  | -0.426806 |
| N    | -0.313796 | 4.398562  | 0.429966  |
| N    | 0.007658  | -2.166614 | 0.005643  |
| N    | 2.166106  | 0.090320  | -0.018833 |
| N    | 0.271995  | -4.348619 | 0.440373  |
| N    | 4.357658  | -0.069445 | -0.456181 |
| N    | -0.016104 | 0.030761  | 1.992978  |
| N    | -0.035077 | 0.017844  | -2.003540 |
| N    | -2.434232 | 0.706864  | -5.673721 |
| N    | -0.809661 | 2.384174  | 5.671807  |
| N    | 1.579253  | -1.613093 | 5.829040  |
| N    | 1.662046  | -1.506821 | -5.845379 |
| C    | -2.903683 | -0.886205 | 0.871202  |
| C    | 0.750054  | 2.942325  | -0.876246 |
| C    | -4.264401 | -0.802316 | 0.623264  |
| C    | 0.605015  | 4.296930  | -0.623216 |
| C    | -3.147303 | 0.570145  | -0.786147 |
| C    | -0.711085 | 3.113645  | 0.785934  |
| C    | -2.924475 | 1.581369  | -1.860122 |
| C    | -1.707210 | 2.842292  | 1.863031  |
| C    | -5.685434 | 0.558020  | -1.006143 |
| C    | -0.806503 | 5.648591  | 1.021719  |
| C    | -6.189654 | 1.896878  | -0.472268 |
| C    | -2.164148 | 6.108363  | 0.495004  |
| C    | -5.821338 | 2.372220  | 0.808297  |
| C    | -2.633481 | 5.728319  | -0.784282 |
| C    | -6.334950 | 3.594453  | 1.291749  |
| C    | -3.873825 | 6.204157  | -1.260564 |
| C    | -7.226732 | 4.351593  | 0.503443  |
| C    | -4.655670 | 7.068598  | -0.465986 |
| C    | -7.598738 | 3.883361  | -0.775041 |
| C    | -4.193819 | 7.451518  | 0.811649  |
| C    | -7.079000 | 2.666062  | -1.261402 |
| C    | -2.958033 | 6.970089  | 1.290520  |
| C    | -0.813892 | -2.902992 | -0.859230 |
| C    | 2.863700  | 0.944428  | 0.846818  |
| C    | -0.659335 | -4.255742 | -0.602305 |
| C    | 4.221990  | 0.854715  | 0.588187  |
| C    | 0.666820  | -3.059967 | 0.786607  |
| C    | 3.088833  | -0.524209 | -0.801817 |
| C    | 1.669799  | -2.776684 | 1.854412  |
| C    | 2.851867  | -1.538949 | -1.869642 |



|   |           |           |           |
|---|-----------|-----------|-----------|
| C | 0.778905  | -5.594954 | 1.027604  |
| C | 5.626688  | -0.524032 | -1.038141 |
| C | 2.130613  | -6.050840 | 0.482466  |
| C | 6.129167  | -1.859708 | -0.494702 |
| C | 2.580734  | -5.671385 | -0.803864 |
| C | 5.769468  | -2.319920 | 0.793811  |
| C | 3.815411  | -6.145028 | -1.296782 |
| C | 6.282899  | -3.538714 | 1.286056  |
| C | 4.610534  | -7.006219 | -0.511918 |
| C | 7.165374  | -4.307484 | 0.498523  |
| C | 4.167792  | -7.388457 | 0.772659  |
| C | 7.528576  | -3.854390 | -0.787894 |
| C | 2.937617  | -6.909523 | 1.267984  |
| C | 7.009313  | -2.640394 | -1.282826 |
| C | 0.106224  | 0.130278  | 3.182220  |
| C | -0.133590 | -0.109323 | -3.192366 |
| C | 0.253557  | 0.260808  | 4.567632  |
| C | -0.262663 | -0.262870 | -4.577208 |
| C | 0.974789  | -0.740622 | 5.281369  |
| C | 0.766417  | -0.940370 | -5.294481 |
| C | -0.318535 | 1.399727  | 5.206152  |
| C | -1.427758 | 0.258970  | -5.211585 |
| H | -2.368271 | -1.488237 | 1.610537  |
| H | 1.374237  | 2.437057  | -1.618419 |
| H | -5.124795 | -1.299075 | 1.082499  |
| H | 1.061310  | 5.180442  | -1.080538 |
| H | -5.122509 | 1.788050  | 1.430196  |
| H | -2.029986 | 5.050627  | -1.411091 |
| H | -6.033750 | 3.956358  | 2.288150  |
| H | -4.230408 | 5.894742  | -2.256370 |
| H | -7.625945 | 5.306169  | 0.882168  |
| H | -5.624122 | 7.438488  | -0.839323 |
| H | -8.290548 | 4.470786  | -1.400550 |
| H | -4.800363 | 8.122091  | 1.442038  |
| H | -7.365308 | 2.310946  | -2.266592 |
| H | -2.607413 | 7.264924  | 2.294825  |
| H | -1.452077 | -2.407177 | -1.595942 |
| H | 2.339431  | 1.556506  | 1.585963  |
| H | -1.115706 | -5.142900 | -1.052394 |
| H | 5.087232  | 1.351383  | 1.038284  |
| H | 1.966526  | -4.996981 | -1.423794 |
| H | 5.078542  | -1.726527 | 1.415833  |
| H | 4.156362  | -5.836982 | -2.298439 |
| H | 5.989336  | -3.888067 | 2.289162  |
| H | 5.574353  | -7.374578 | -0.898479 |
| H | 7.564599  | -5.259210 | 0.884284  |
| H | 4.784812  | -8.056681 | 1.395318  |
| H | 8.213158  | -4.450981 | -1.412677 |
| H | 2.601739  | -7.204436 | 2.277334  |
| H | 7.289326  | -2.296885 | -2.293849 |

|   |           |           |           |
|---|-----------|-----------|-----------|
| H | 1.275523  | -2.981456 | 2.878510  |
| H | 3.043079  | -1.137224 | -2.893415 |
| H | 2.590057  | -3.390444 | 1.719052  |
| H | 3.504078  | -2.431958 | -1.731286 |
| H | 1.950785  | -1.707371 | 1.814773  |
| H | 1.795354  | -1.864978 | -1.832844 |
| H | 0.839291  | -5.467603 | 2.131037  |
| H | 5.509510  | -0.584297 | -2.142684 |
| H | 0.006404  | -6.376438 | 0.842669  |
| H | 6.375939  | 0.277593  | -0.844041 |
| H | -3.148247 | 1.181718  | -2.878524 |
| H | -1.312703 | 3.077802  | 2.880833  |
| H | -3.562997 | 2.481702  | -1.704394 |
| H | -2.634783 | 3.442441  | 1.714772  |
| H | -1.863574 | 1.895505  | -1.847705 |
| H | -1.976221 | 1.769119  | 1.847072  |
| H | -5.573923 | 0.608214  | -2.111794 |
| H | -0.851083 | 5.523626  | 2.126185  |
| H | -6.430682 | -0.244502 | -0.800755 |
| H | -0.033494 | 6.426364  | 0.823811  |
